# Supplementary material for: Generation of complement protein C3 deficient pigs by CRISPR/Cas9-mediated gene targeting
Source: PubMed Central journal article supplement (PMC5503937; doi:10.1038/s41598-017-05400-2), 2017-07-10
Supplement: 41598_2017_5400_MOESM1_ESM.pdf [file 41598_2017_5400_MOESM1_ESM.pdf]

## Generation of complement protein C3 deficient pigs by CRISPR/Cas9-mediated gene targeting

Wei Zhang<sup>1,\*</sup>, Guan Wang<sup>1,\*</sup>, Ying Wang<sup>1,\*</sup>, Yong Jin<sup>1</sup>, Lihua Zhao<sup>1</sup>, Qiang Xiong<sup>1</sup>, Lining Zhang<sup>1</sup>, Lisha Mou<sup>2</sup>, Rongfeng Li<sup>1</sup>, Haiyuan Yang<sup>1</sup> & Yifan Dai<sup>1</sup>

| OTS   | Forward primer 5'→3'    | Reverse primer 5'→3'      | Size of amplicon (bp) | Annealing Temperature (°C) |
|-------|-------------------------|---------------------------|-----------------------|----------------------------|
| OTS1  | AGGGAGCAGTATTGTTGTT     | CGAGTGATTGCCTTGATT        | 382                   | 53                         |
| OTS2  | GCCTCCACCTCCATCAAC      | CCGTGTCTCCACCACAAA        | 677                   | 59                         |
| OTS3  | CATTACTCCTTGCGTGGTC     | CTCGGGACTGTGGTTTCC        | 645                   | 59                         |
| OTS4  | GTCTGTGGCTCTTCTTCTG     | CATCTGCTCCTGCCTTGTA       | 476                   | 56                         |
| OTS5  | GCGACCAAGGGACAGCATT     | GGTAACCAGACCCCTGAGCCAGGGT | 623                   | 65                         |
| OTS6  | ATCTTTAACTCCCAACAGT     | CCTAGCGAATCATTCTT         | 497                   | 50                         |
| OTS7  | TCTGGGCGACTTCAACGC      | AAATGGTCACTGATGGCAAGG     | 579                   | 59                         |
| OTS8  | CAGGAAGGGCTGCCAGAGGT    | CGTGGTGGGCTTGGGAAAGG      | 361                   | 64                         |
| OTS9  | TCTGTGACTATCTCCCAGTT    | TTCCCTTAGCAAATACCTT       | 390                   | 53                         |
| OTS10 | TGGGACCACAAGCATCAG      | GCTACTACTTCTCCTTCC        | 395                   | 59                         |
| OTS11 | CTTGCCATTGCTTAGAACA     | TGACAGGGAAGGACGGTGAT      | 543                   | 58                         |
| OTS12 | TCTGAGCCTTAGTTTCTTCTGC  | GCTTCTGGATGGGTCTGTT       | 622                   | 58                         |
| OTS13 | TTCTCGGCTTCTGCATTTGT    | CCATCCCATGAACGGTCTTA      | 524                   | 56                         |
| OTS14 | AGTGCGGTAGGGTCTGTA      | CTTAGGTGCAATAGGATG        | 517                   | 55                         |
| OTS15 | AATAGTAGAGGGTCTTCTGTCTG | AGTAGGATAATCTTCTGAGGC     | 384                   | 58                         |
| OTS16 | GGGAACGAGGAAATGGTC      | GGGCAAGAAGGGATAACTG       | 425                   | 57                         |
| OTS17 | GCACCTCAACTATTATCT      | TAAACCACTTGTCTGCC         | 483                   | 53                         |
| OTS18 | ATGGTCCATGTTGAGAAA      | AAGGCAGTATCAGTGTAT        | 408                   | 50                         |
| OTS19 | TTCATTAGTCTCATATCCGTAG  | GGTTCCATTTCAAGCAGT        | 315                   | 55                         |
| OTS20 | GACGAAATCATTGTATCTGCT   | GGACTTTGCCTTTGTGG         | 574                   | 55                         |
| OTS21 | ATCAATTCCTGGCTTTC       | ATCTTGGAGTTGGCTTCT        | 357                   | 53                         |
| OTS22 | CAGAGGTGAGGGAGGAGAAAGG  | CAAGCAGGGTCAGCAGACAG      | 590                   | 63                         |
| OTS23 | TCCTGGGATGCTTGTTCCG     | GGCTGCGGCTGTACTTTT        | 324                   | 57                         |
| OTS24 | GGCATCTGTCTGGTAAGGG     | AGAAACTGGGCACGCTGA        | 584                   | 58                         |
| OTS25 | TTTTGATCCCAGAAAACATTG   | GACAACACCCTCGCCCTA        | 460                   | 55                         |
| OTS26 | GCTGGCATGTGACTTTCT      | TGGAGGGTCTGCTTGTAG        | 436                   | 56                         |
| OTS27 | AGGTGAGGTCAGAATGCAGGAG  | AGTGCGGGTGGGAGAAA         | 367                   | 61                         |

**Table S1 Primers for off-target sites detection.**

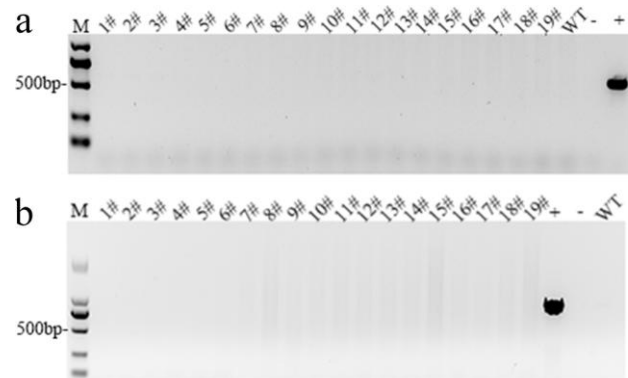

**Figure S1 Plasmid integration detection by PCR amplification.** (a) Cas9-sgRNA targeting vector integration into C3 KO piglet genome was not detected. +: pX330 vector; -: no template control; 1#-19#: C3 KO piglets. (b) TD-tomato integration into C3 KO piglet genome was not detected. +: TD-tomato plasmid; -: no template control; 1#-19#: C3 KO piglets.

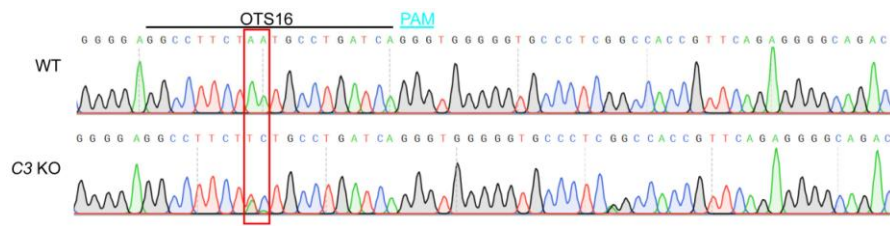

**Figure S2 Sequences around the OTS16.**

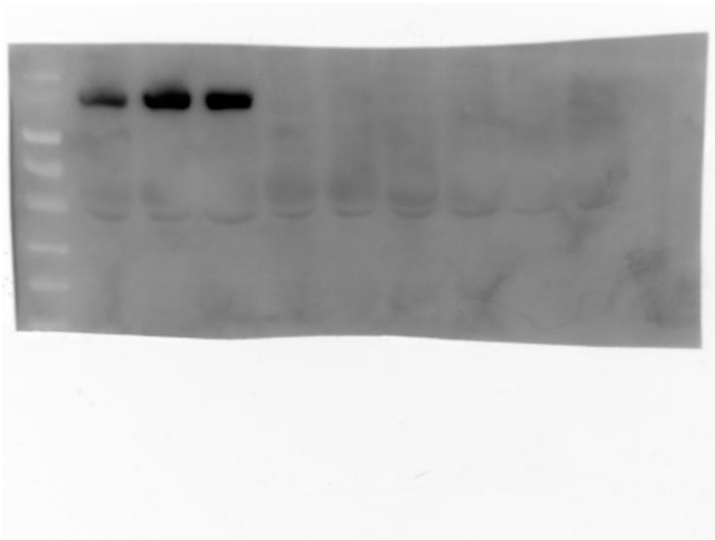

**Figure S3 The full-length blots of serum C3 $\alpha$ .**

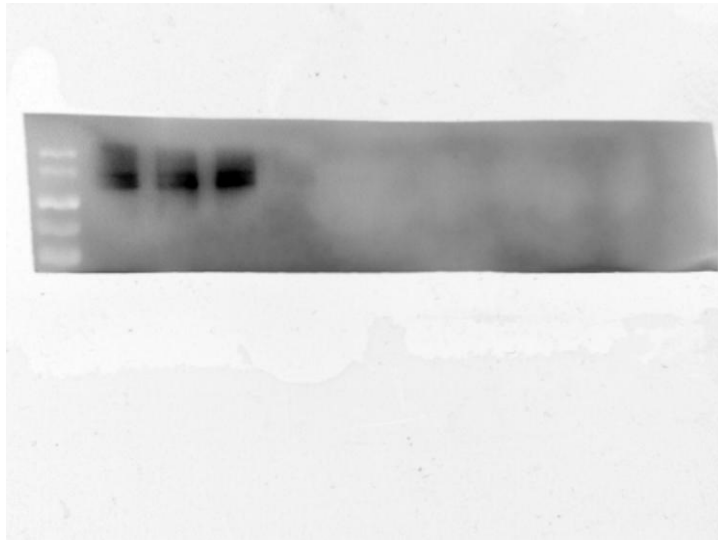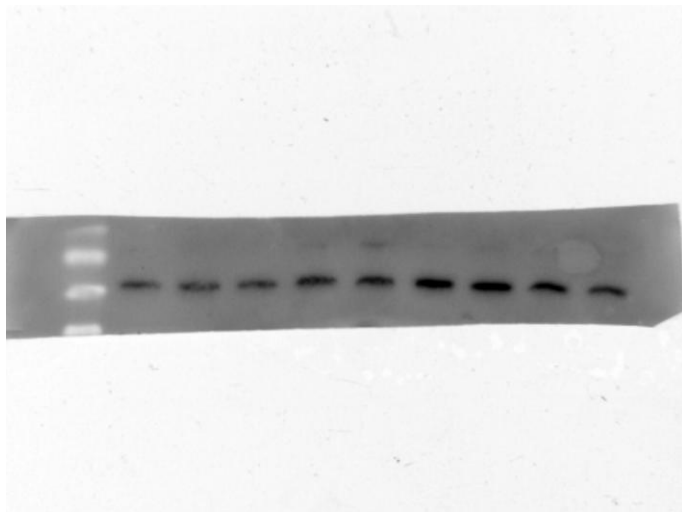

**Figure S4 The full-length blots of liver C3 $\alpha$  (up) and GAPDH (down)**

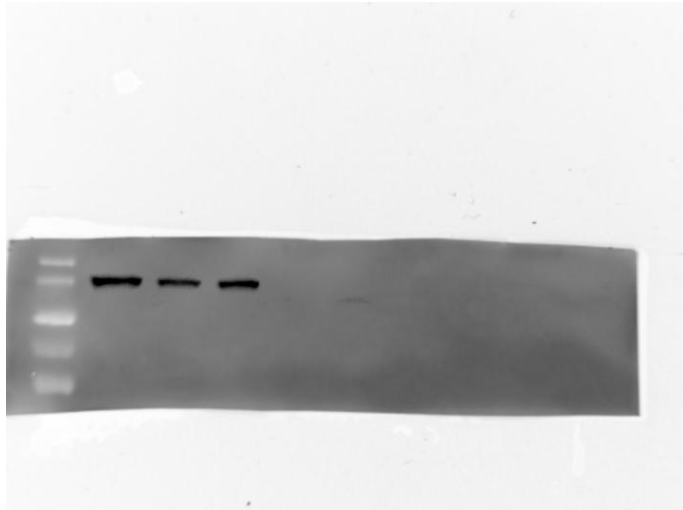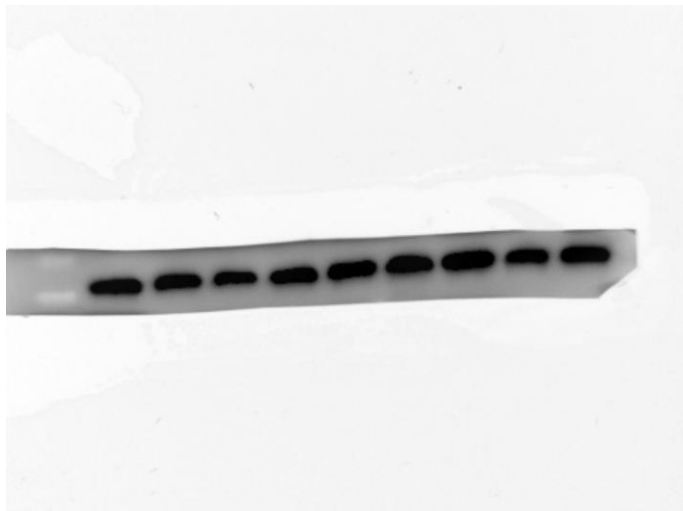

**Figure S5** The full-length blots of lung C3 $\alpha$  (up) and GAPDH (down)

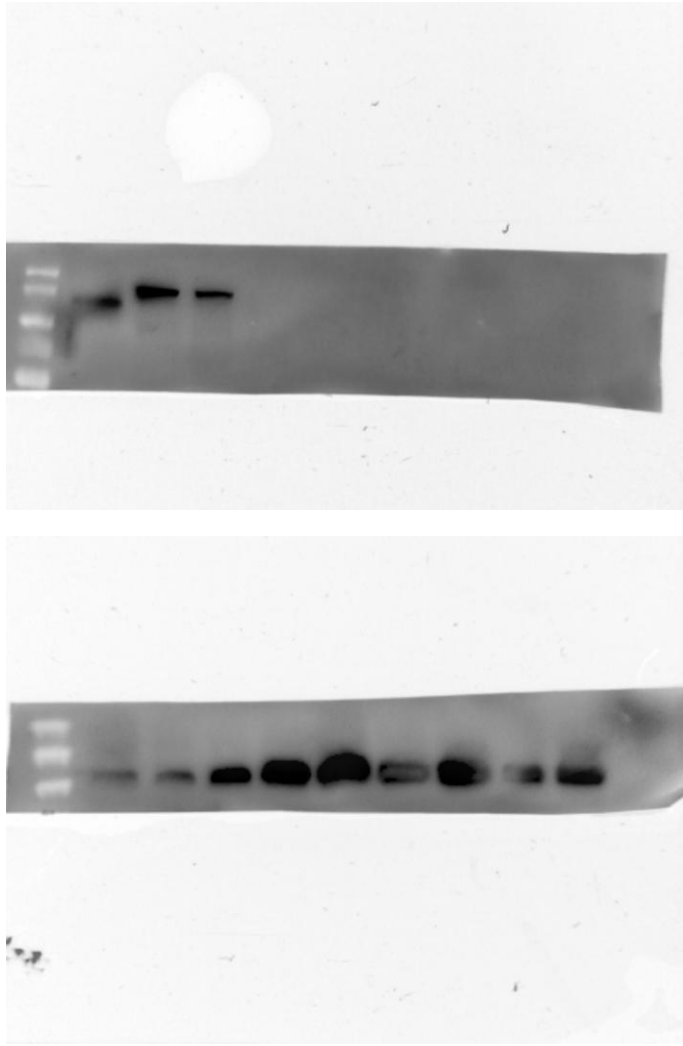

**Figure S6 The full-length blots of kidney C3 $\alpha$  (up) and GAPDH (down)**

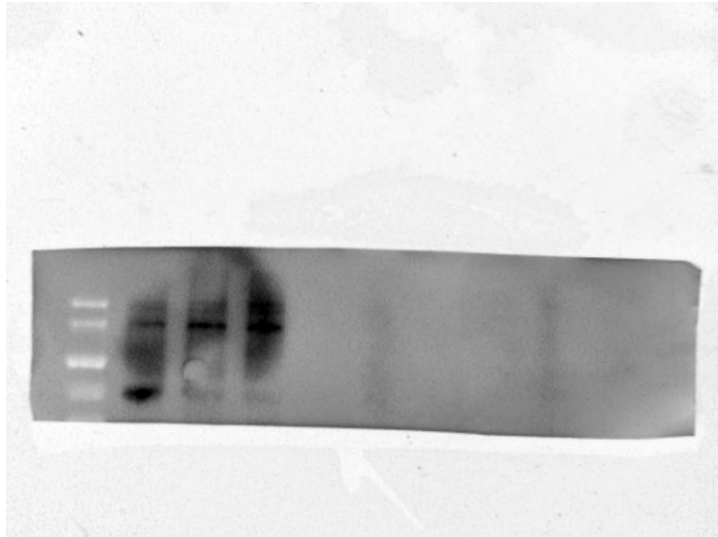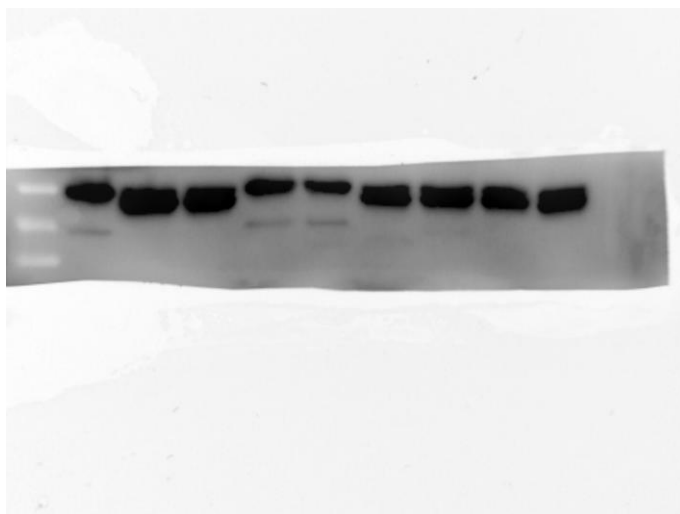

**Figure S7** The full-length blots of spleen C3 $\alpha$  (up) and GAPDH (down)
